# Supplementary material
Source: publisher figshare collection journal article supplement (https://acs.figshare.com/ndownloader/files/4619050)
Supplement: Supplementary file 1 [file 4619050]

# Supporting Information

## Synthesis of Fullerooxazoles: Novel Reactions of [60]Fullerene with Nitriles Promoted by Ferric Perchlorate

Fa-Bao Li,<sup>†</sup> Tong-Xin Liu,<sup>†</sup> and Guan-Wu Wang<sup>\*,†,‡</sup>

<sup>†</sup> *Hefei National Laboratory for Physical Sciences at Microscale and Department of  
Chemistry, University of Science and Technology of China, Hefei, Anhui, 230026, P.*

*R. China*

<sup>‡</sup> *State Key Laboratory of Applied Organic Chemistry, Lanzhou University, Lanzhou,*

*Gansu 730000, P. R. China*

*gwang@ustc.edu.cn*

|                                                    |     |
|----------------------------------------------------|-----|
| <sup>1</sup> H NMR spectrum of compound <b>2a</b>  | S2  |
| <sup>13</sup> C NMR spectrum of compound <b>2a</b> | S3  |
| <sup>1</sup> H NMR spectrum of compound <b>2b</b>  | S4  |
| <sup>13</sup> C NMR spectrum of compound <b>2b</b> | S5  |
| <sup>1</sup> H NMR spectrum of compound <b>2c</b>  | S6  |
| <sup>1</sup> H NMR spectrum of compound <b>2d</b>  | S7  |
| <sup>13</sup> C NMR spectrum of compound <b>2d</b> | S8  |
| <sup>1</sup> H NMR spectrum of compound <b>2e</b>  | S9  |
| <sup>1</sup> H NMR spectrum of compound <b>2f</b>  | S10 |
| <sup>13</sup> C NMR spectrum of compound <b>2f</b> | S11 |
| <sup>1</sup> H NMR spectrum of compound <b>2g</b>  | S12 |
| <sup>13</sup> C NMR spectrum of compound <b>2g</b> | S13 |
| <sup>1</sup> H NMR spectrum of compound <b>2h</b>  | S14 |
| <sup>13</sup> C NMR spectrum of compound <b>2h</b> | S15 |

<sup>1</sup>H NMR (300 MHz, CS<sub>2</sub>/CDCl<sub>3</sub>) of compound 2a

Current Data Parameters  
 NAME 1f567100801  
 EXPNO 1  
 PROCNO 1

F2 - Acquisition Parameters  
 Date\_ 20071008  
 Time 17.17  
 INSTRUM av300  
 PROBHD 5 mm BBO BB-1H  
 PULPROG zg  
 TD 32768  
 SOLVENT CDCl<sub>3</sub>  
 NS 32  
 DS 1  
 SWH 8992.806 Hz  
 FIDRES 0.274439 Hz  
 AQ 1.8219508 sec  
 RG 362  
 DW 55.600 usec  
 DE 6.00 usec  
 TE 300.0 K  
 DI 2.00000000 sec  
 MCREST 0.00000000 sec  
 MCWRK 0.01500000 sec

===== CHANNEL f1 =====  
 NUC1 1H  
 P1 7.50 usec  
 PL1 -3.00 dB  
 SFO1 300.1321009 MHz

F2 - Processing parameters  
 SI 16384  
 SF 300.1300060 MHz  
 WDW ro  
 SSB 0  
 LB 0.00 Hz  
 GB 0  
 PC 1.00

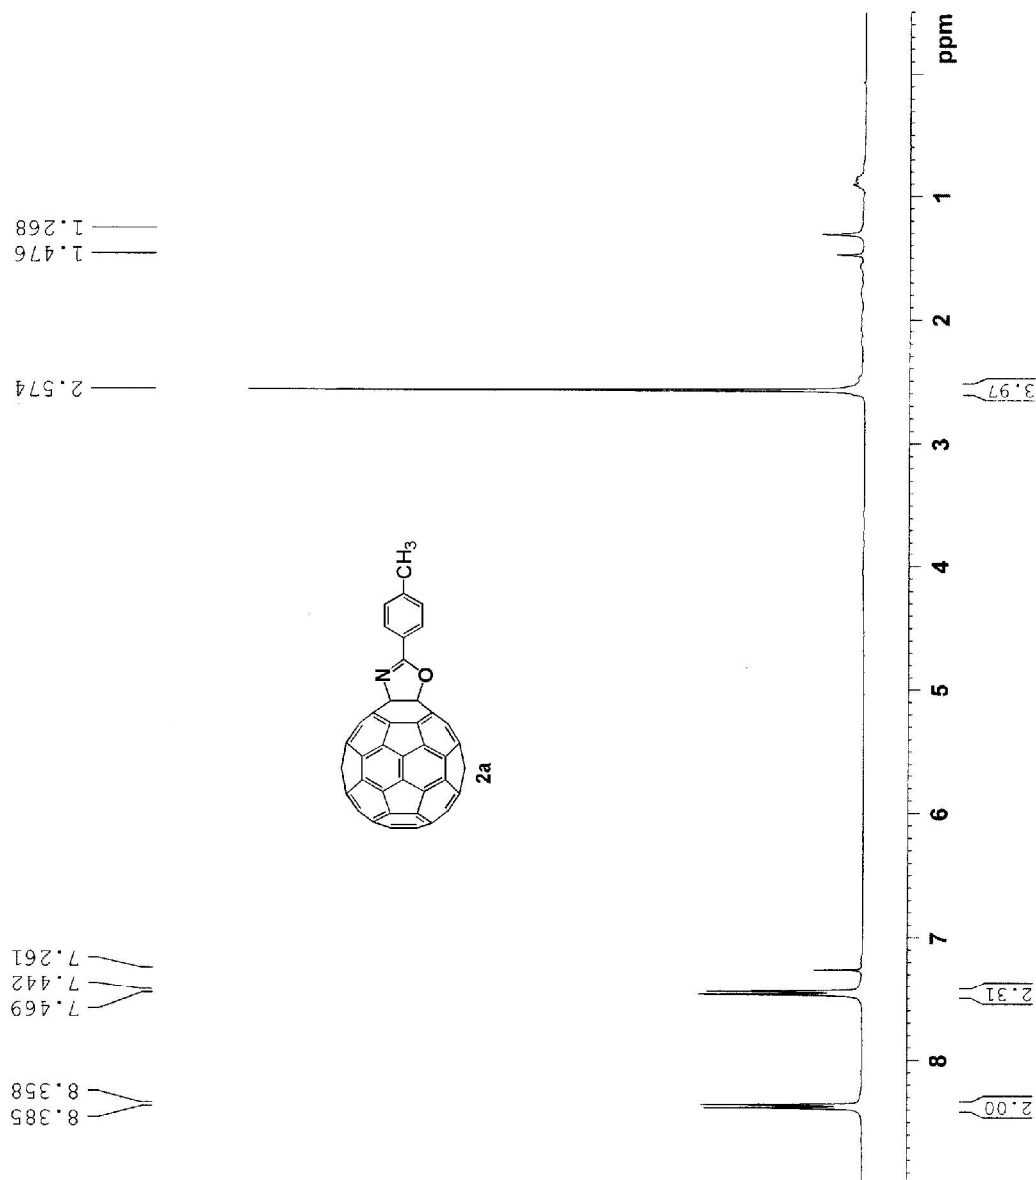

**<sup>13</sup>C NMR (75 MHz, CS<sub>2</sub>/CDCl<sub>3</sub>) of compound 2a**

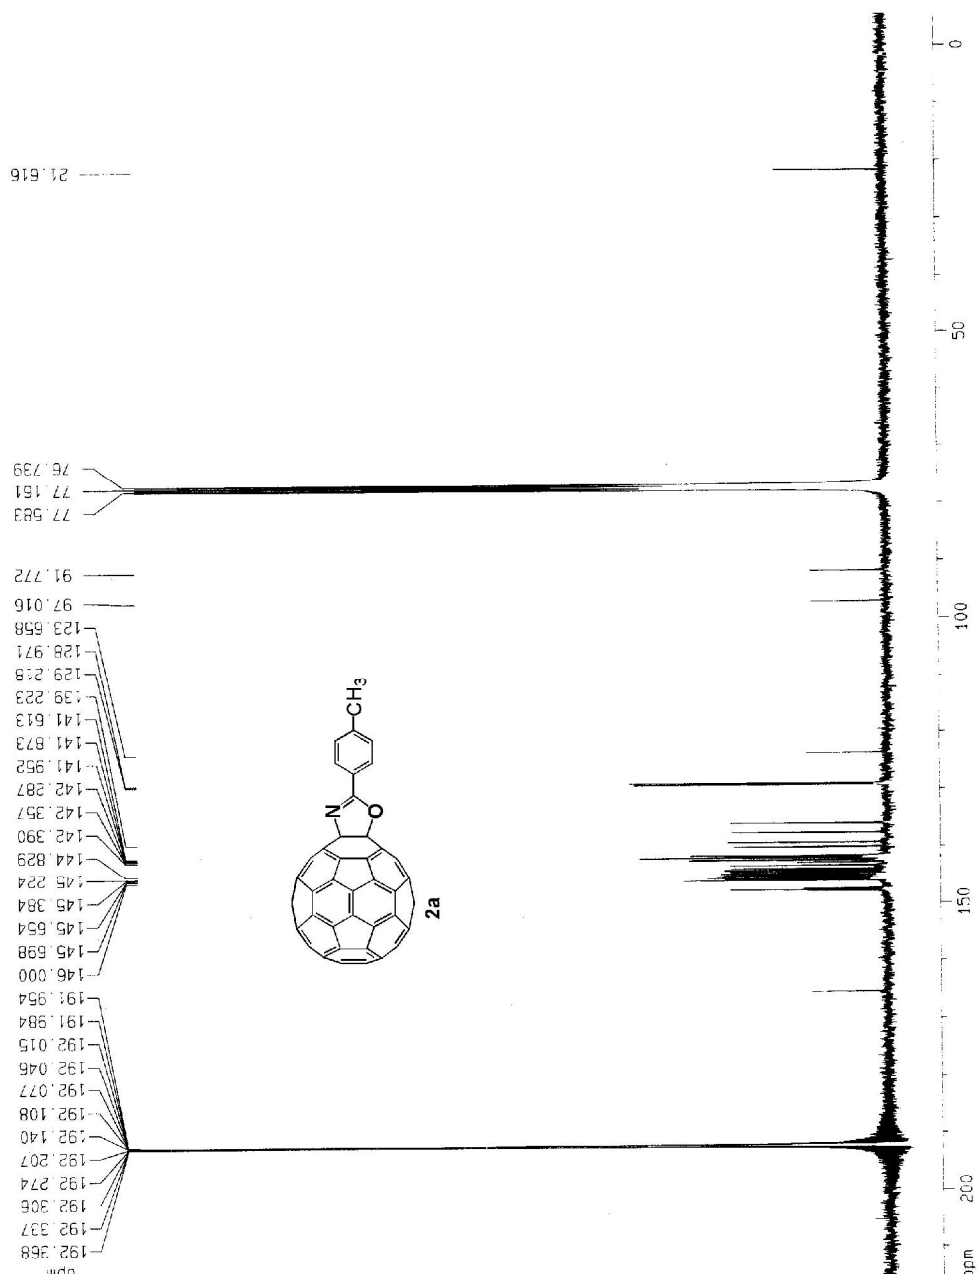

Current Data Parameters  
NAME 17u07100801  
EXPNO 4  
PROCNO 1

F2 - Acquisition Parameters  
Date\_ 20071009  
Time 6.10  
INSTRUM av300  
PROBHD 5 mm BBO BB-1H  
PULPROG zgpg30  
TD 32768  
SOLVENT Acetone  
NS 16432  
DS 4  
SWH 37878.789 Hz  
FIDRES 1.455969 Hz  
AQ 0.4325876 sec  
RG 6502  
DM 13.200 usec  
DE 6.00 usec  
TE 300.0 K  
D1 2.00000000 sec  
d11 0.03000000 sec  
MCREST 0.00000000 sec  
MCARRK 0.01500000 sec

===== CHANNEL f1 =====  
NUC1 13C  
P1 3.00 usec  
PL1 -1.00 dB  
SF01 75.4758051 MHz

===== CHANNEL f2 =====  
CPDPRG2 waltz16  
NUC2 1H  
PCPD2 80.00 usec  
PL2 -3.00 dB  
PL12 16.00 dB  
SF02 300.1315007 MHz

F2 - Processing parameters  
SI 131072  
SF 75.4577843 MHz  
WDW EM  
SSB 0  
LB 1.50 Hz  
GB 0  
PC 1.40

1D NMR plot parameters  
CX 22.00 cm  
CY 0.00 cm  
F1P 215.932 ppm  
F1 16295.93 Hz  
F2P -5.550 ppm  
F2 -418.84 Hz  
PPMCM 10.05/37 ppm/cm  
HZCM 759.75208 Hz/cm

<sup>1</sup>H NMR (300 MHz, CS<sub>2</sub>/CDCl<sub>3</sub>) of compound 2b

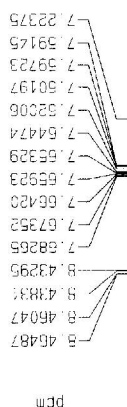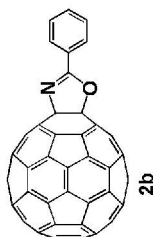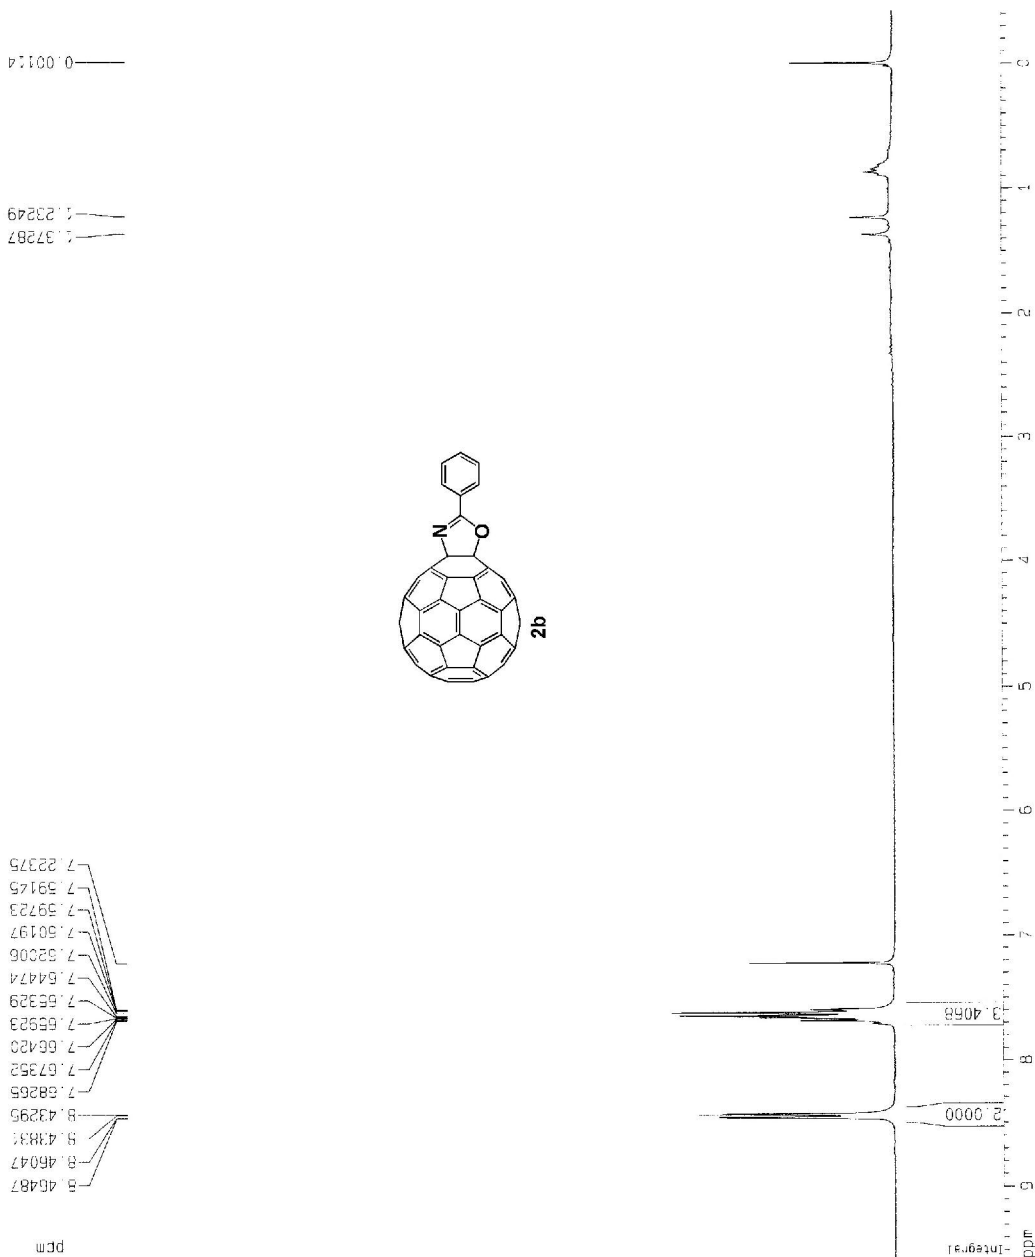

Current Data Parameters  
 NAME 1f06c1801  
 EXNO 1  
 PROCNO 1

F2 - Acquisition Parameters  
 Date\_ 2006-018  
 Time 16 52  
 INSTRUM av300  
 PROBHD 5 mm BBO BB-1H  
 PULPROG zg  
 TD 65536  
 SOLVENTI CDCl3  
 NS 32  
 DS 1  
 SWH 8892.806 Hz  
 FIDRES 0.137219 Hz  
 AQ 3.6438515 sec  
 RG 456.1  
 CW 55.600 usec  
 DE 6.00 usec  
 TE 300.0 K  
 D1 2.00000000 sec  
 NUCREST 0.00000000 sec  
 NUCNRC 0.01500000 sec

===== CHANNEL f1 =====  
 NUC1 1H  
 P1 7.50 usec  
 PL1 3.00 dB  
 SF01 300.1321009 MHz

F2 - Processing parameters  
 SI 15384  
 SF 300.1300174 MHz  
 WDW to  
 SSB 0  
 LB 0.00 Hz  
 GB 0  
 PC 1.20

1D NMR plot parameters  
 CX 22.00 cm  
 CY 0.00 cm  
 F1P 9.571 ppm  
 F1 2872.50 Hz  
 F2P -0.426 ppm  
 F2 -127.74 Hz  
 PPMCM 0.45440 ppm/cm  
 HZCM 136.37915 Hz/cm

**<sup>13</sup>C NMR (75 MHz, CS<sub>2</sub>/CDCl<sub>3</sub>) of compound 2b**

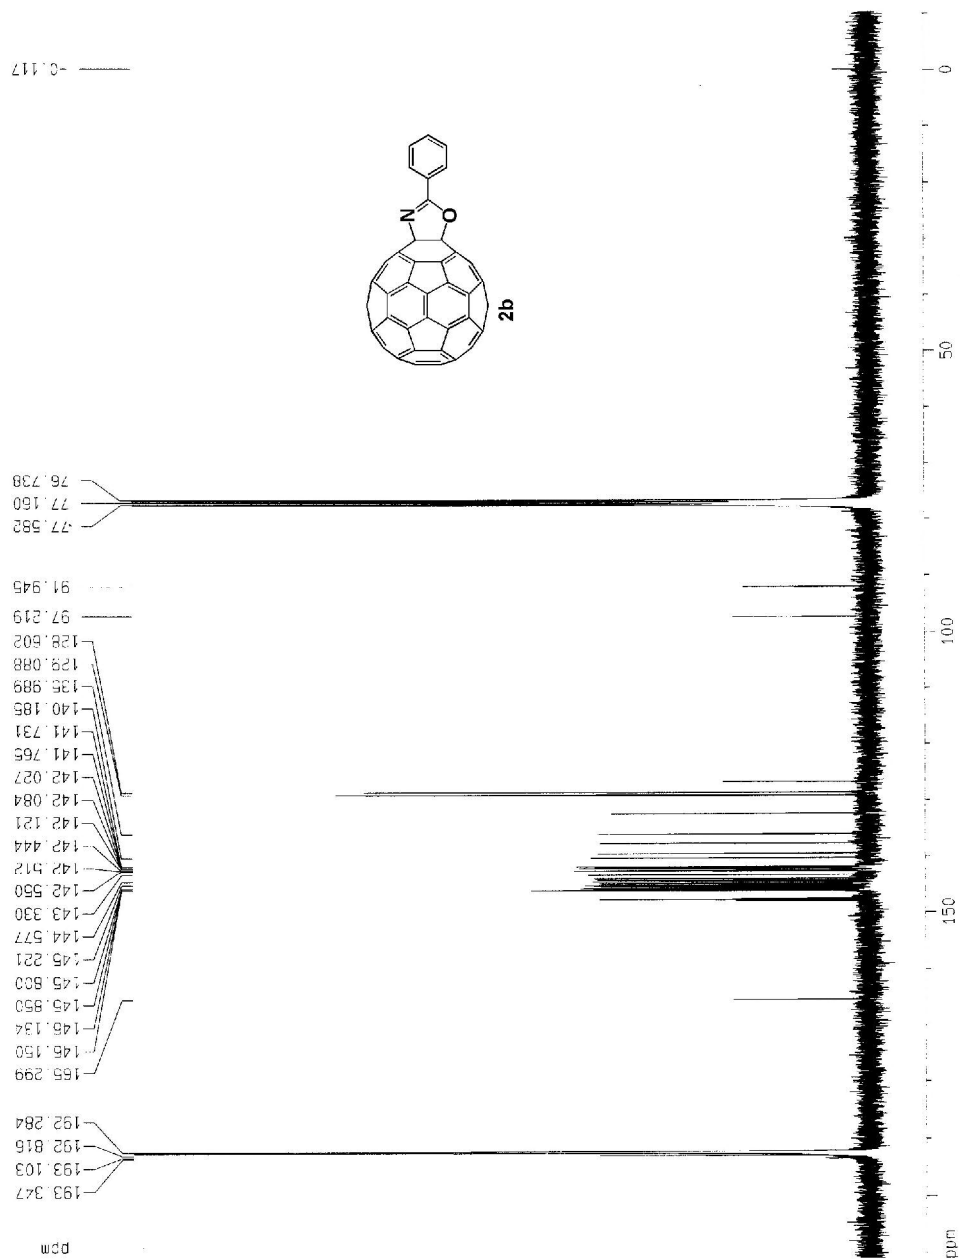

Current Data Parameters  
NAME 1f061018C1  
EXPNO 2  
PROCNO 1

F2 - Acquisition Parameters  
Date\_ 20061019  
Time 6.01  
INSTRUM av300  
PROBHD 5 mm BBO BB-1H  
PULPROG zgpg30  
TD 65536  
SOLVENT CDCl3  
NS 15017  
DS 4  
SWH 22675.736 Hz  
FIDRES 0.346004 Hz  
AQ 1.4451186 sec  
RG 4597.6  
DW 22.050 usec  
DE 6.00 usec  
TE 300.0 K  
D1 2.00000000 sec  
d11 0.03000000 sec  
MCREST 0.00000000 sec  
MCNMR 0.01500000 sec

===== CHANNEL f1 =====  
NUC1 13C  
P1 3.00 usec  
PL1 -4.00 dB  
SF01 75.47756051 MHz

===== CHANNEL f2 =====  
CPDPRG2 waltz16  
NUC2 1H  
PCPD2 80.00 usec  
PL2 -3.00 dB  
PL12 16.00 dB  
SF02 300.1315007 MHz

F2 - Processing parameters  
SI 131072  
SF 75.4677749 MHz  
WDW EM  
SSB 0  
LB 0.50 Hz  
GB 0  
PC 1.40

1D NMR plot parameters  
CX 22.00 cm  
CY 0.00 cm  
F1P 211.175 ppm  
F1 15937.19 Hz  
F2P -10.349 ppm  
F2 -781.05 Hz  
PPHMM 10.56946 ppm/cm  
HZCM 759.91966 Hz/cm

<sup>1</sup>H NMR (300 MHz, CS<sub>2</sub>/CDCl<sub>3</sub>) of compound 2c

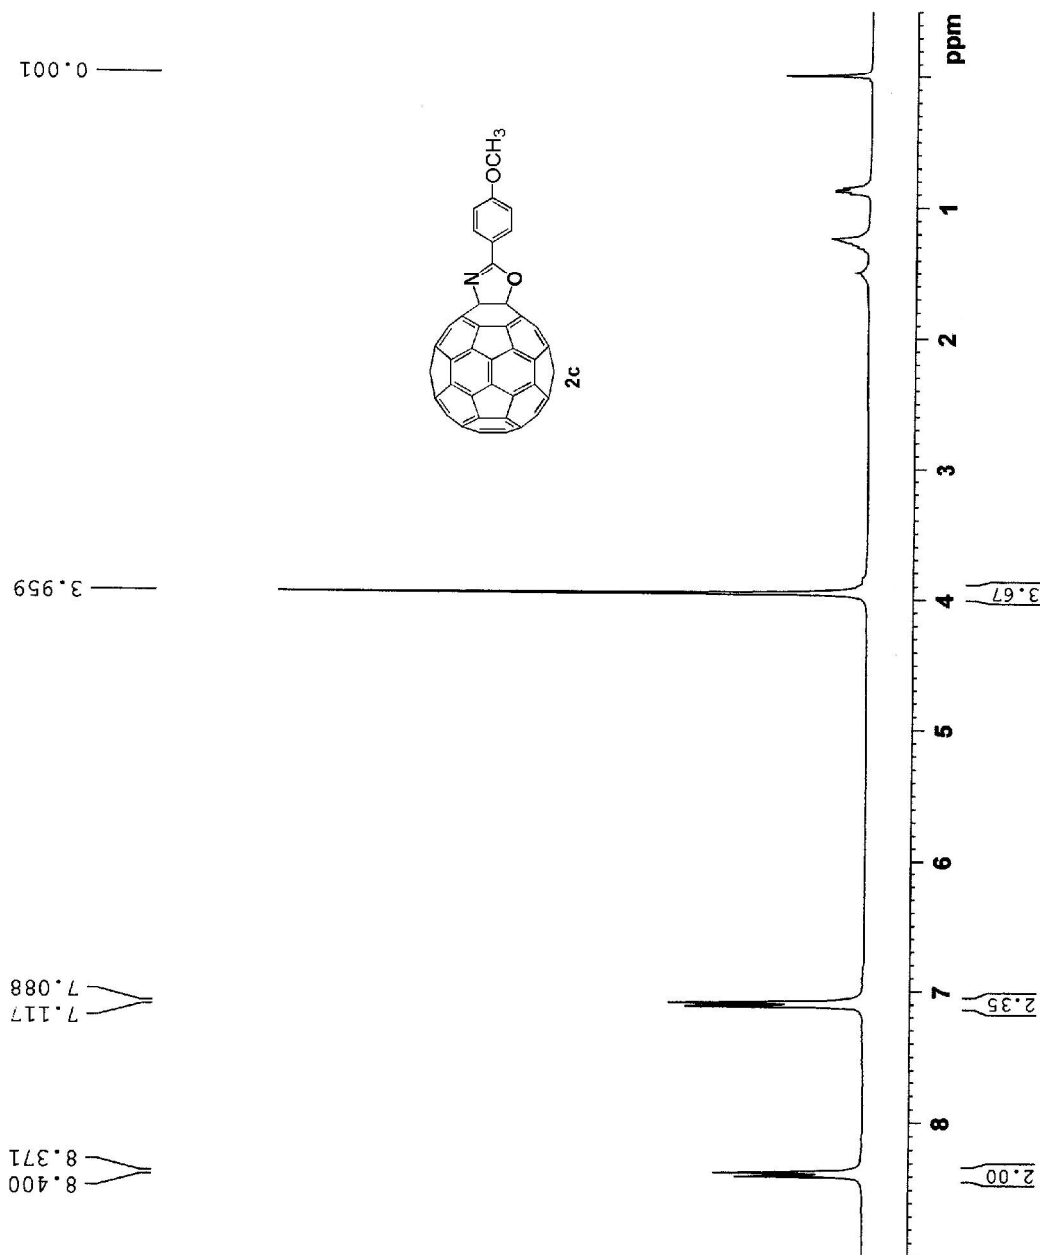

Current Data Parameters  
 NAME lfb08032802  
 EXPNO 1  
 PROCNO 1  
 F2 - Acquisition Parameters  
 Date\_ 20080328  
 Time 17.00  
 INSTRUM av300  
 PROBHD 5 mm BBO BB-1H  
 PULPROG zg30  
 TD 32768  
 SOLVENT CDCl3  
 NS 32  
 DS 1  
 SWH 5995.204 Hz  
 FIDRES 0.182959 Hz  
 AQ 2.7339011 sec  
 RG 287.4  
 DW 83.400 usec  
 DE 6.00 usec  
 TE 300.0 K  
 DL 2.00000000 sec  
 MCREST 0.00000000 sec  
 MCWRR 0.01500000 sec  
 CHANNEL f1  
 NUC1 1H  
 P1 7.50 usec  
 PL1 -3.00 dB  
 SFO1 300.1321009 MHz  
 F2 - Processing parameters  
 SI 16384  
 SF 300.1300161 MHz  
 WDW EM  
 SSB 0  
 LB 0.30 Hz  
 GB 0  
 PC 1.00

**<sup>1</sup>H NMR (300 MHz, CS<sub>2</sub>/CDCl<sub>3</sub>) of compound 2d**

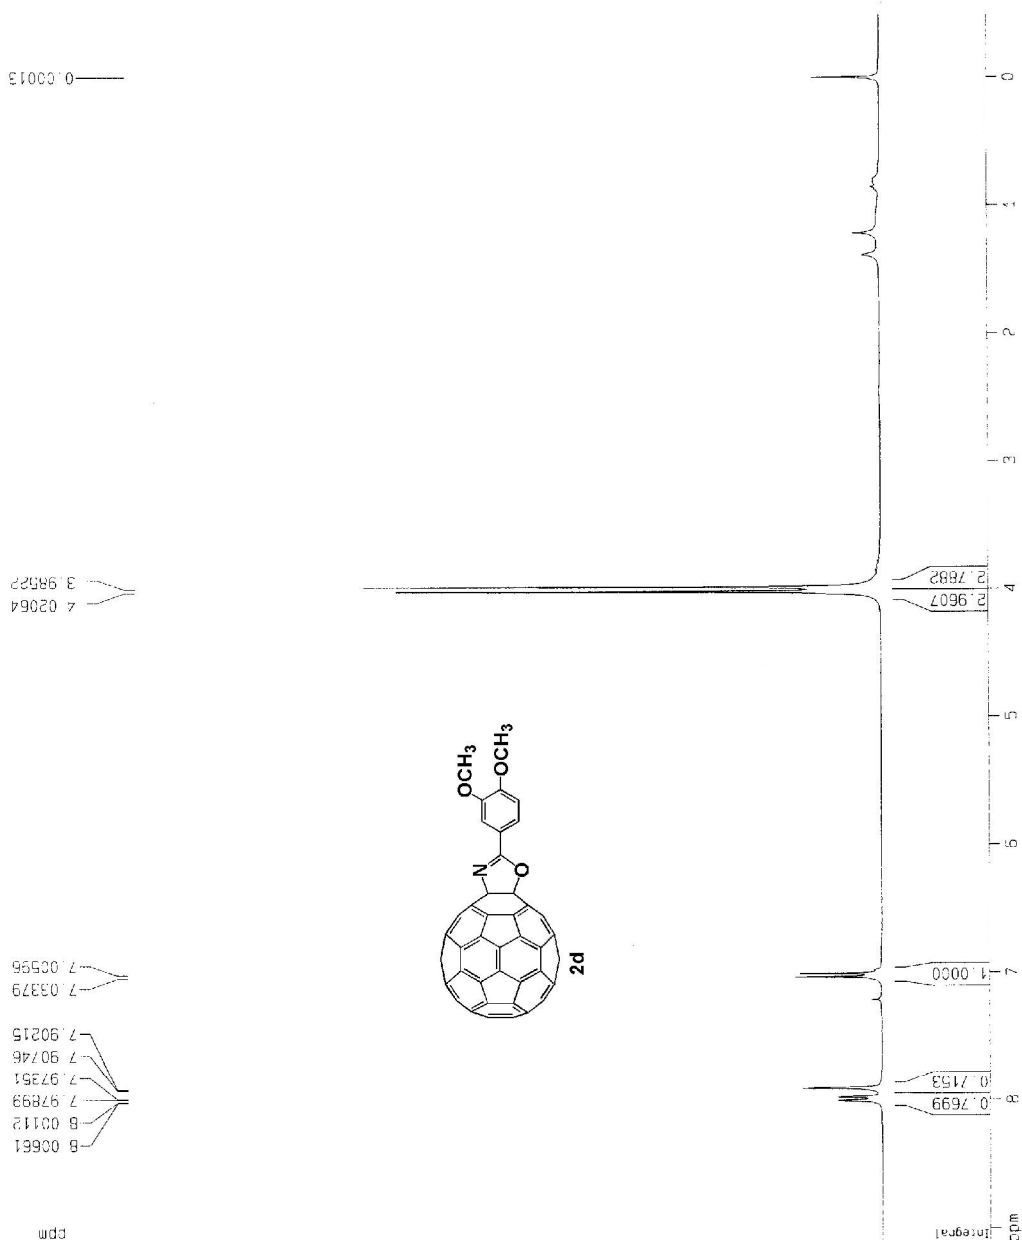

Current Data Parameters  
NAME \_f00710100\_  
EXPNO 1  
PROCNO 1  
F2 - Acquisition Parameters  
Date\_ 20071010  
Time 17.02  
INSTRUM av300  
PROBHD 5 mm BBO BB-1H  
PULPROG zg  
TD 32768  
SOLVENT CDCl3  
NS 16  
DS 1  
SWH 6992.306 Hz  
FIDRES 0.274439 Hz  
AQ 1.8219508 sec  
RG 287.4  
CW 55.600 usec  
DE 6.00 usec  
TE 300.0 K  
D1 2.00000000 sec  
MCREST 0.00000000 sec  
MCWRR 0.01500000 sec  
===== CHANNEL f1 =====  
NUC1 1H  
P1 7.50 usec  
PL1 -3.00 dB  
SF01 300.1321039 MHz  
F2 - Processing parameters  
SI 16384  
SF 300.1300223 MHz  
WDW no  
SSB 0  
LB 0.00 Hz  
GB 0  
EC 1.00  
ID NMR plot parameters  
CX 22.00 cm  
CY 0.00 cm  
F1 9.113 ppm  
F2 2735.22 Hz  
F2P -0.494 ppm  
F2 -148.19 Hz  
PPMCM 0.43669 ppm/cm  
HZCM 131.06400 Hz/cm

**<sup>13</sup>C NMR (75 MHz, CS<sub>2</sub>/CDCl<sub>3</sub>) of compound 2d**

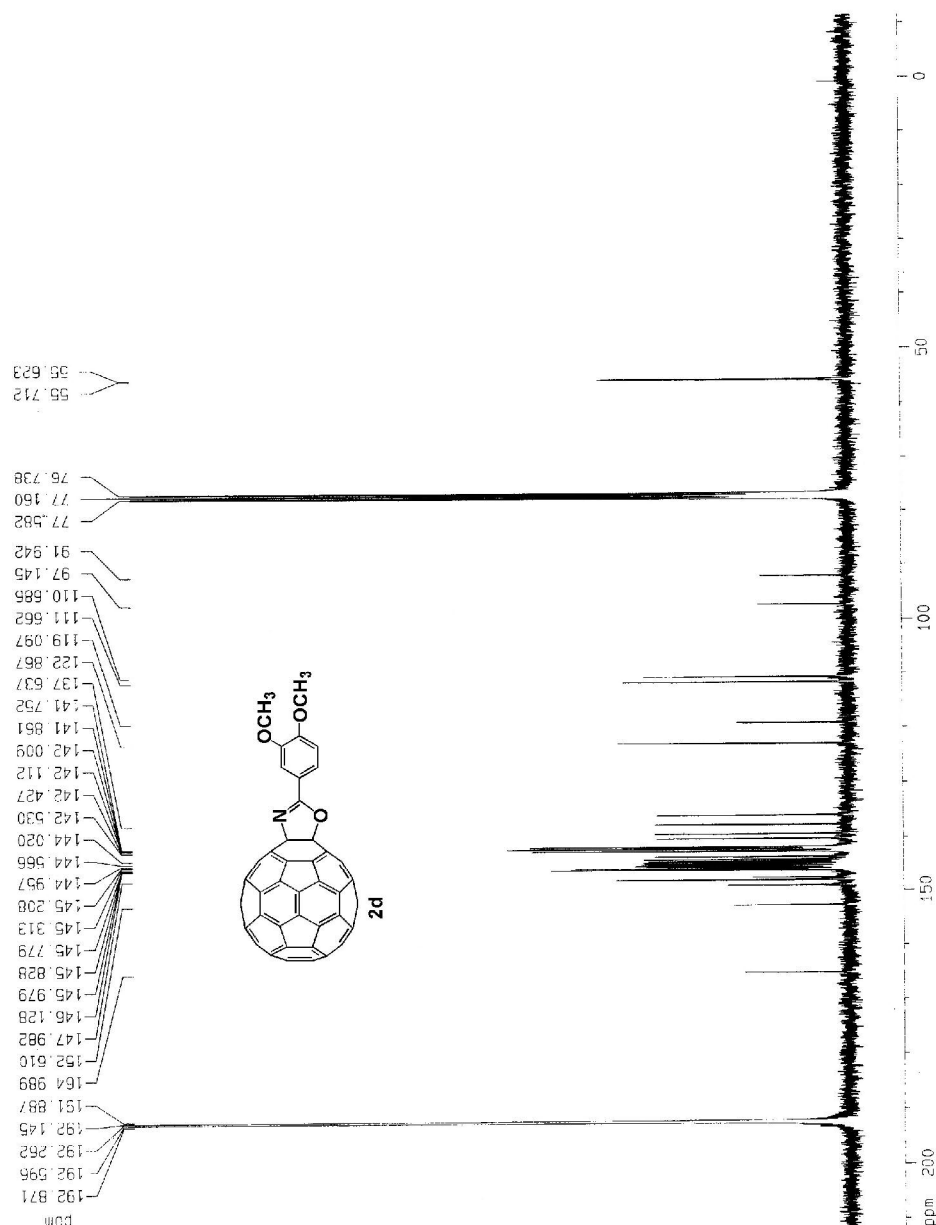

Current Data Parameters  
NAME 1f607101002  
EXPNO 4  
PROCNO 1

F2 - Acquisition Parameters  
Date\_ 20071011  
Time 7.45  
INSTRUM av300  
PROBHD 5 mm BBO BB-1H  
PULPROG zgpg30  
TD 32768  
SOLVENT CDCl3  
NS 13432  
DS 4  
SWH 22675.736 Hz  
FIDRES 0.692009 Hz  
AQ 0.7225844 sec  
RG 9195.2  
DM 22.050 usec  
DE 6.00 usec  
TE 300.0 K  
D1 2.00000000 sec  
d11 0.03000000 sec  
VCREST 0.00000000 sec  
XCMRK 0.01500000 sec

===== CHANNEL f1 =====  
NUC1 13C  
P1 3.00 usec  
PL1 -1.00 dB  
SF01 75.4768051 MHz

===== CHANNEL f2 =====  
CPDPRG2 waltz16  
NUC2 1H  
PCPD2 80.00 usec  
PL2 -3.00 dB  
PL12 16.00 dB  
SF02 300.1315007 MHz

F2 - Processing parameters  
SI 131072  
SF 75.4677253 MHz  
WDW EM  
SSB 0  
LB 1.00 Hz  
GB 0  
PC 1.40

1D NMR plot parameters  
CX 22.00 cm  
CY 0.00 cm  
FIP 211.700 ppm  
F1 15976.55 Hz  
F2 -11.505 ppm  
F2 -888.26 Hz  
FPMCM 10.14571 ppm/cm  
GZCM 765.67419 Hz/cm



<sup>1</sup>H NMR (300 MHz, CS<sub>2</sub>/CDCl<sub>3</sub>) of compound 2e

8.333  
8.305  
7.772  
7.744

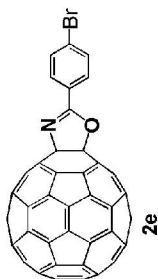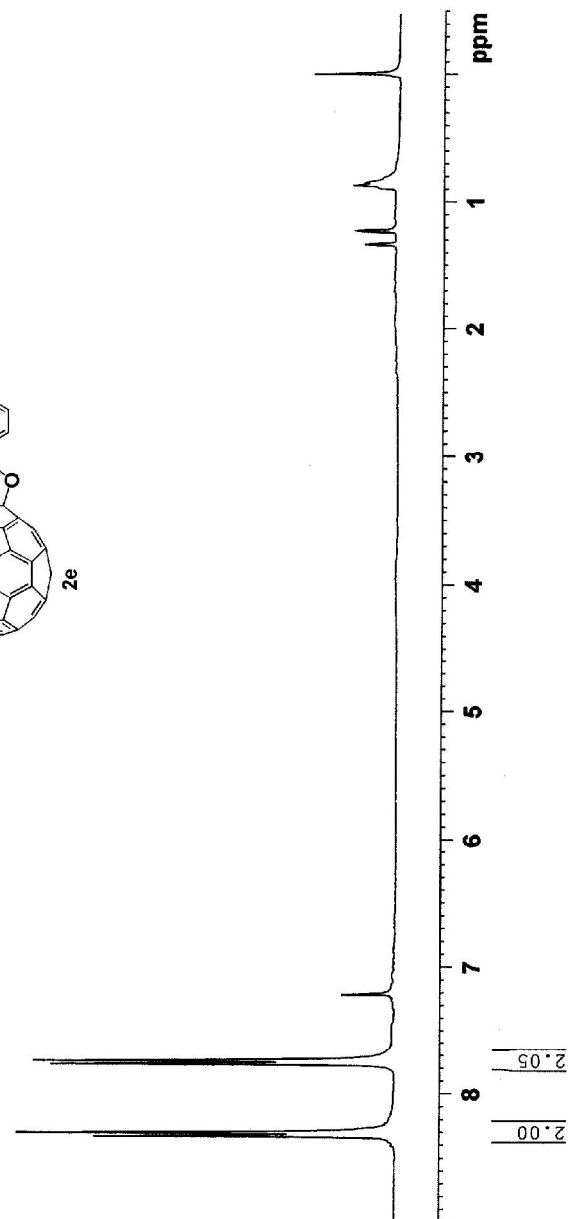

Current Data Parameters  
NAME lfb08032801  
EXPNO 1  
PROCNO 1

F2 - Acquisition Parameters  
Date\_ 20080328  
Time\_ 17.05  
INSTRUM 5 mm BBO BB-1H  
PROBHD av300  
PULPROG zg  
TD 32768  
SOLVENT CDCl3  
NS 32  
DS 1  
SWH 5995.204 Hz  
FIDRES 0.182959 Hz  
AQ 2.7329011 sec  
RG 406.4  
DW 83.400 usec  
DE 6.00 usec  
TE 300.0 K  
D1 2.00000000 sec  
MCREST 0.00000000 sec  
NCNCRK 0.01500000 sec

===== CHANNEL f1 =====  
NUC1 1H  
P1 7.50 usec  
PL1 -3.00 dB  
SFO1 300.1321009 MHz

F2 - Processing parameters  
SI 16384  
SF 300.1300190 MHz  
WDW EM  
SSB 0  
LB 0  
GB 0  
PC 1.00

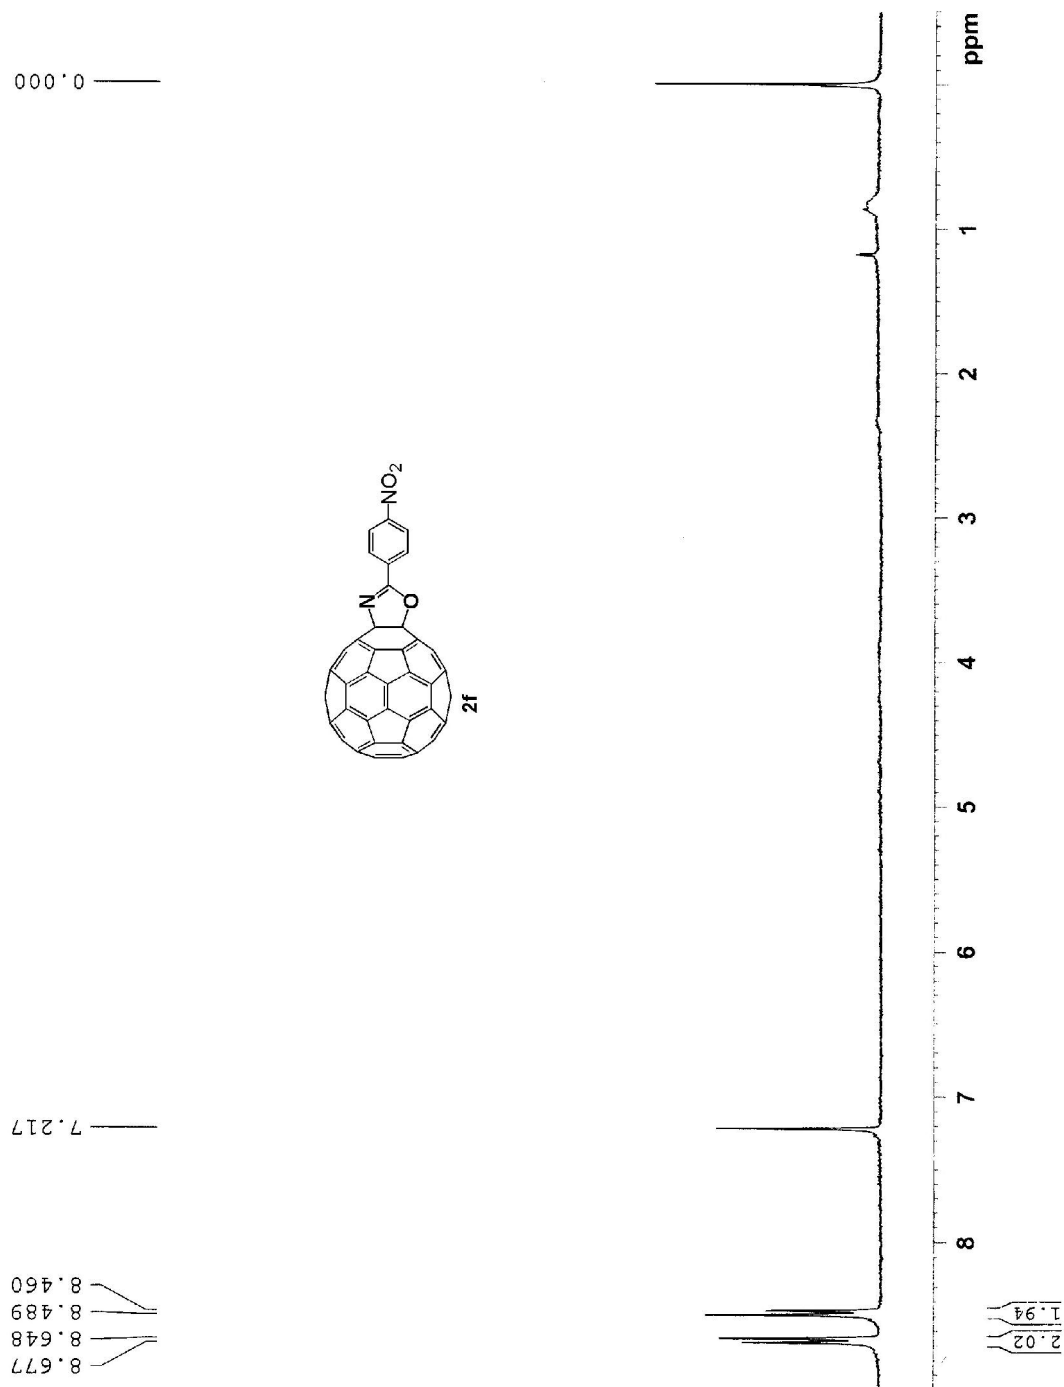

**<sup>13</sup>C NMR (75 MHz, CS<sub>2</sub>/CDCl<sub>3</sub>) of compound 2f**

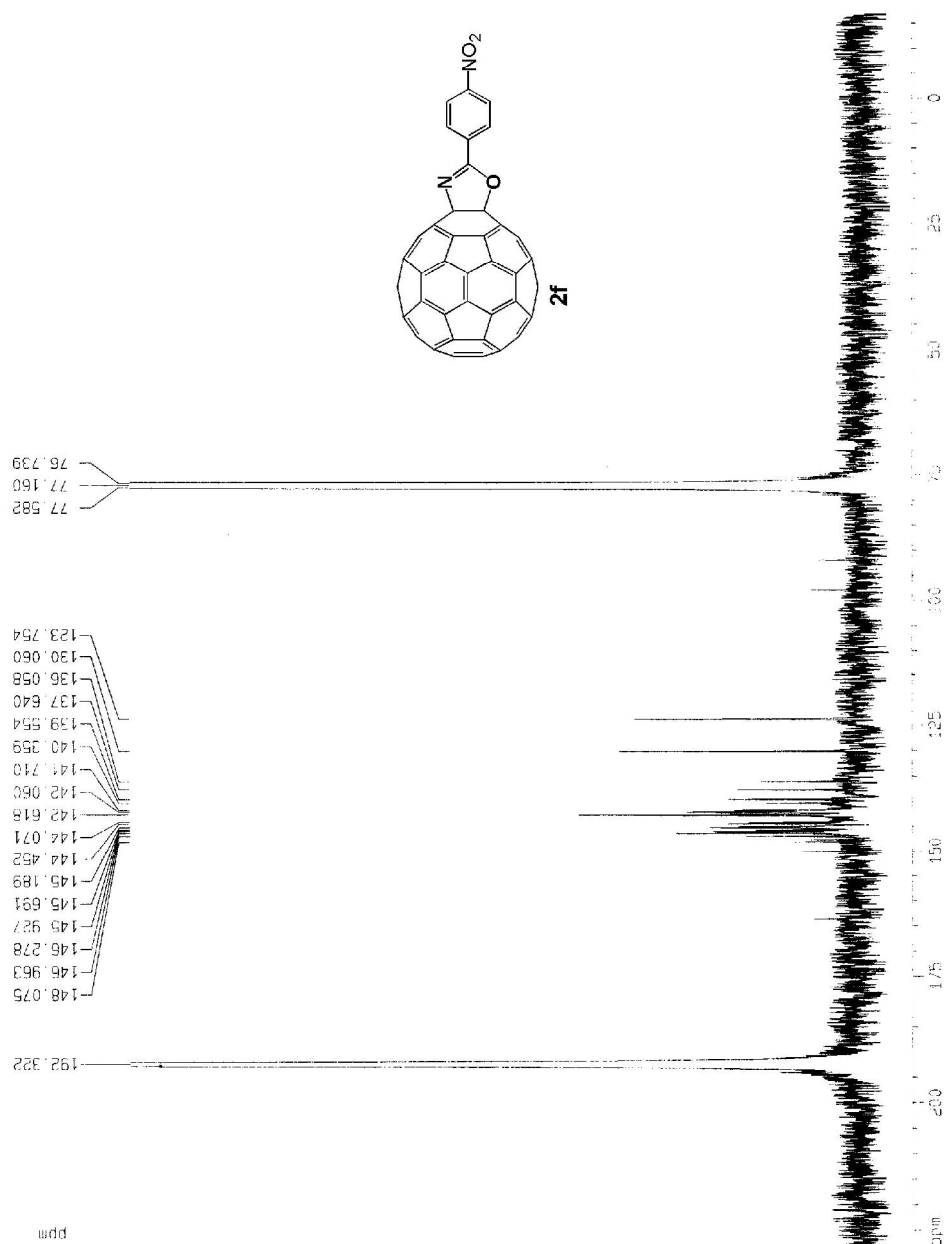

Current Data Parameters  
NAME 1f607112901  
EXPNO 4  
PROCNO 1

F2 - Acquisition Parameters  
Date\_ 20071128  
Time 7.56  
INSTRUM av300  
PROBHD 5 mm BBO BB-1H  
PULPROG zgpg  
TD 32768  
SOLVENT DMSO  
NS 21163  
DS 4  
SWH 37878.799 Hz  
FIDRES 1.155968 Hz  
AQ 0.4325876 sec  
RG 912.3  
DK 13.200 usec  
DE 6.00 usec  
TE 300.0 K  
D1 2.00000000 sec  
d11 0.03000000 sec  
wDRES1 0.00000000 sec  
wDWRK 0.01500000 sec

===== CHANNEL f1 =====  
NUC1 <sup>13</sup>C  
P1 3.00 usec  
PL1 -1.00 dB  
SF01 75.4756051 MHz

===== CHANNEL f2 =====  
CPDPRG2 waltz16  
NUC2 <sup>1</sup>H  
PCPD2 80.00 usec  
PL2 -3.00 dB  
PL12 16.00 dB  
SF02 300.1315007 MHz

F2 - Processing parameters  
SI 32768  
SF 75.4677710 MHz  
WDW EM  
SSB 0  
LB 4.00 Hz  
GB 0  
PC 1.40

1D NMR plot parameters  
CX 22.00 cm  
CY 0.00 cm  
ZIP 228.068 mm  
F1 17211.77 Hz  
F2 -15.850 ppm  
F2 -1271.62 Hz  
SFOCM 11.13262 ppm/cm  
AQCM 840.15411 Hz/cm



**<sup>13</sup>C NMR (75 MHz, CS<sub>2</sub>/CDCl<sub>3</sub>) of compound 2g**

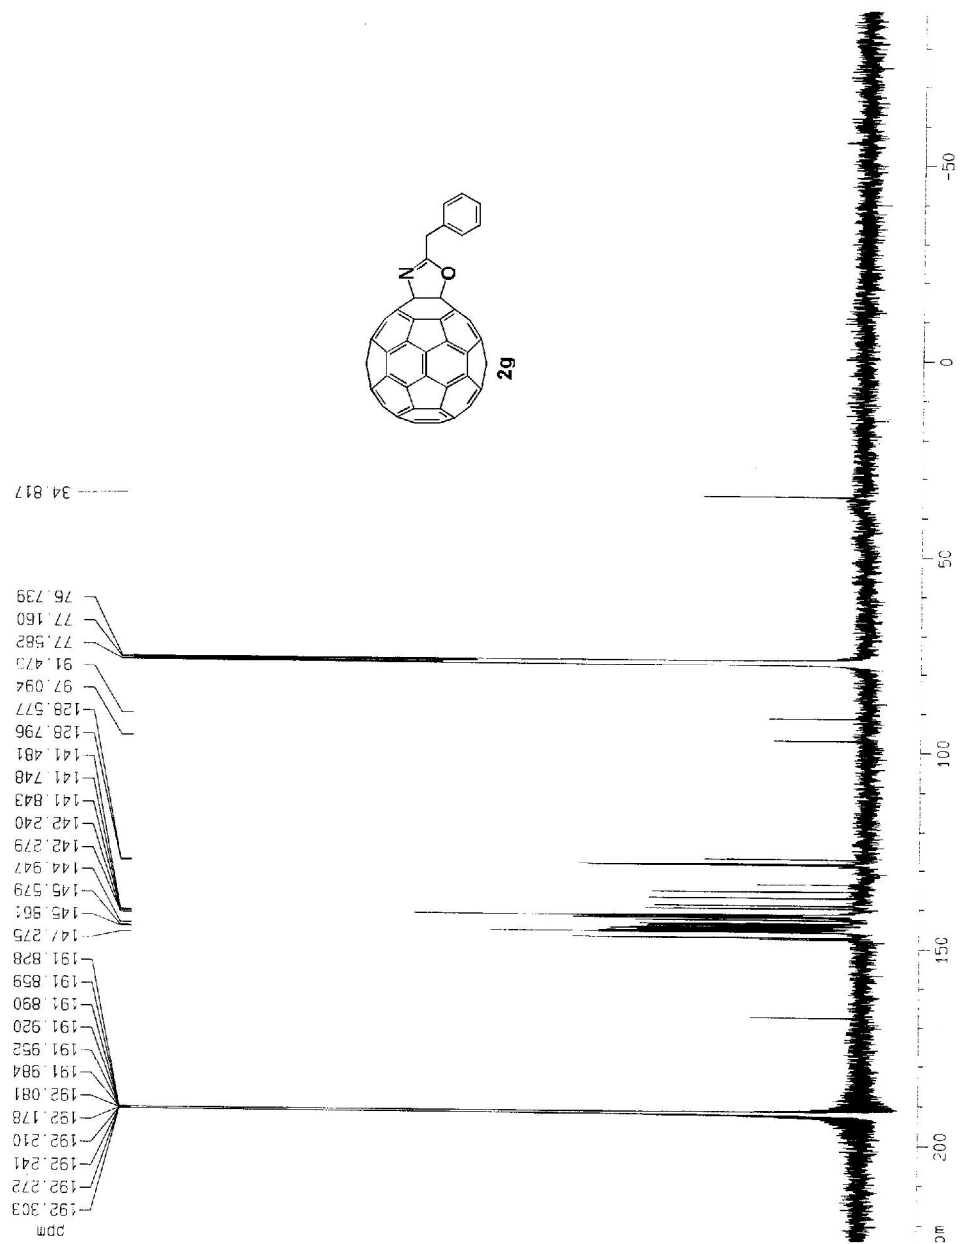

```

Current Data Parameters
NAME      1f007101501
EXPNO     4
PROCNO    1

F2 - Acquisition Parameters
Date_     20071015
Time      7.12
INSTRUM   av300
PROBHD    5 mm BBO BB-1H
PULPROG   zgpg30
TD         32768
SOLVENT   CDCl3
NS         20480
DS         4
SWH        37878.789 Hz
FIDRES     1.155969 Hz
AQ          0.4325676 sec
RG          728H-2
DM          13.200 usec
DE          5.00 usec
TE          300.0 K
D1          2.00000000 sec
d11         0.03000000 sec
MCREST     0.00000000 sec
MCWRRK     0.01500000 sec

===== CHANNEL f1 =====
NUC1        13C
P1           3.00 usec
PL1         -1.00 dB
SFO1        75.4768051 MHz

===== CHANNEL f2 =====
CPDPRG2     waltz16
NUC2         1H
PCPD2        80.00 usec
PL2          -3.00 dB
PL12         16.00 dB
SFO2        300.1315007 MHz

F2 - Processing parameters
SI          131072
SF          75.4677942 MHz
RG          EM
WDW          0
SSB          0
LB           2.00 Hz
GB           0
PC           1.40

1D NMR plot parameters
CX          22.00 cm
CY           0.00 cm
F1P         226.956 ppm
F1          17127.85 Hz
F2P         -89.333 ppm
F2          -6741.80 Hz
SFOCM       14.37678 ppm/cm
F2CM        1084.98401 Hz/cm
    
```

<sup>1</sup>H NMR (300 MHz, CS<sub>2</sub>/CDCl<sub>3</sub>) of compound 2h

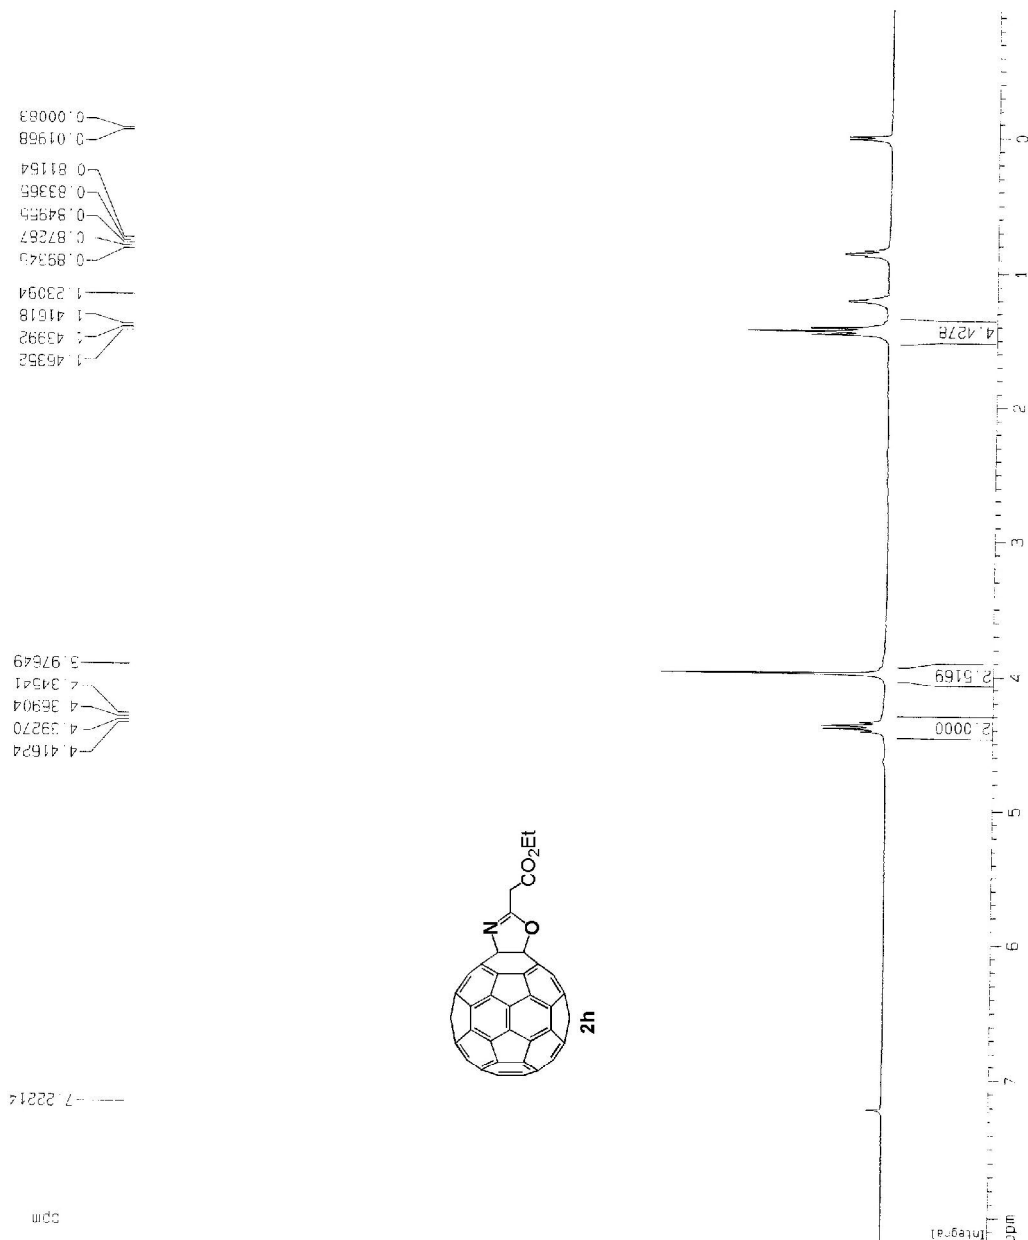

Current Data Parameters  
 NAME: 1f07101701  
 EXPNO: 1  
 PROCNO: 1

F2 - Acquisition Parameters  
 Date\_: 20071017  
 Time: 16.54  
 INSTRUM: av300  
 PROBHD: 5 mm BBO BB-1H  
 PULPROG: zg30  
 TD: 32768  
 SOLVENT: CDCl3  
 NS: 24  
 DS: 4  
 SWH: 8937.805 Hz  
 FIDRES: 0.274439 Hz  
 AQ: 0.1819568 sec  
 RG: 322.5  
 DW: 55.600 usec  
 DE: 6.00 usec  
 TE: 300.0 K  
 D1: 2.00000000 sec  
 MCREST: 0.00000000 sec  
 MCPR: 0.01500000 sec

===== CHANNEL f1 =====  
 NUC1: 1H  
 P1: 7.50 usec  
 PL1: -2.00 dB  
 SFO: 300.1321009 MHz

F2 - Processing parameters  
 SI: 16394  
 SF: 300.1300175 MHz  
 WDW: n0  
 SSB: 0  
 LB: 0.00 Hz  
 GB: 0  
 PC: 1.00

1D NMR plot parameters  
 CX: 22.00 cm  
 CY: 0.00 cm  
 F1p: 8.177 ppm  
 F1: 2454.12 Hz  
 F2p: -0.955 ppm  
 F2: -286.54 Hz  
 PHC: 0.41507 ppm/cm  
 HZCM: 124.57567 Hz/cm

**<sup>13</sup>C NMR (75 MHz, CS<sub>2</sub>/CDCl<sub>3</sub>) of compound 2h**

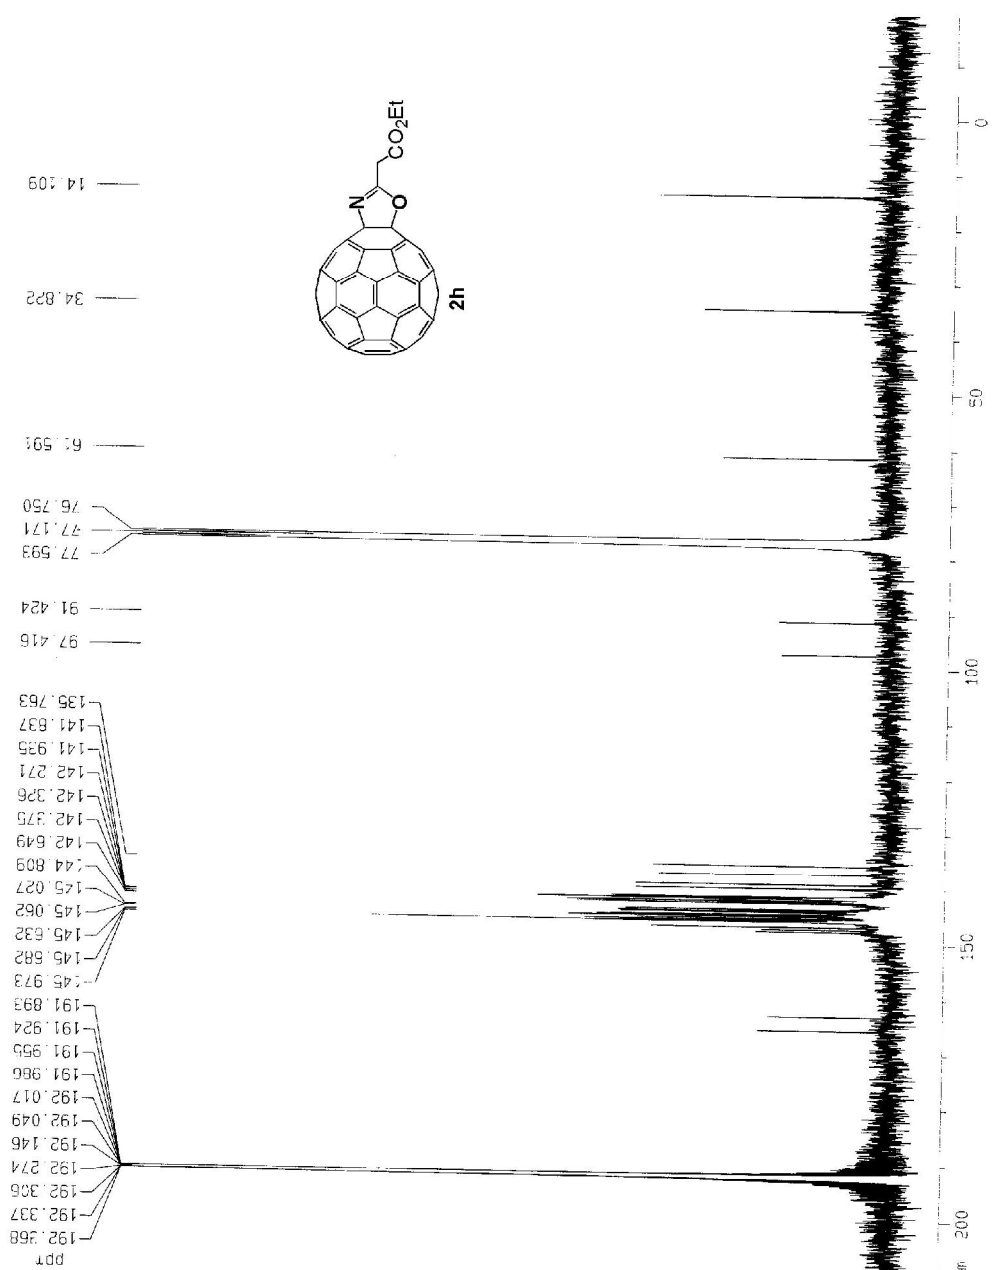

Current Data Parameters  
 NAME : /7607101701  
 EXPNO : 4  
 PROCNO : 1

F2 - Acquisition Parameters  
 Date\_ : 20071018  
 Time : 7.28  
 INSTRUM : av300  
 PROBHD : 5 mm BBO BB-1H  
 PULPROG : zgpg30  
 TD : 32768  
 SOLVENT : CDCl<sub>3</sub>  
 NS : 2048  
 DS : 4  
 SWH : 37878.769 Hz  
 FIDRES : 1.155969 Hz  
 AQ : 0.4325676 sec  
 RG : 2048  
 DW : 13.220 usec  
 DE : 6.00 usec  
 TE : 300.0 K  
 D1 : 2.00000000 sec  
 d11 : 0.03000000 sec  
 MCHES : 0.00000000 sec  
 MCWAK : 0.01500000 sec

===== CHANNEL f1 =====  
 NUC1 : <sup>13</sup>C  
 P1 : 3.00 usec  
 PL1 : -1.00 dB  
 SF01 : 75.4756051 MHz

===== CHANNEL f2 =====  
 CPDPRG2 : waltz16  
 NUC2 : <sup>1</sup>H  
 PCPD2 : 80.00 usec  
 PL2 : -3.00 dB  
 PL12 : 15.00 dB  
 SF02 : 300.1315007 MHz

F2 - Processing parameters  
 SI : 131072  
 SF : 75.4677975 MHz  
 WDW : EM  
 SSB : 0  
 LB : 2.00 Hz  
 GB : 0  
 PC : 1.40

1D NMR plot parameters  
 CX : 22.00 cm  
 CY : 0.00 cm  
 FIP : 211.907 ppm  
 F1 : 15992.12 Hz  
 F2P : -19.136 ppm  
 F2 : -1444.15 Hz  
 PP4CM : 10.50193 ppm/cm  
 ZCM : 792.55762 Hz/cm
